# Supplementary material
Source: Springer Nature journal article supplement (https://www.springermedizin.de/resource/supplementary/12889_2010_2929_MOESM2_ESM.pdf/9487710)
Supplement: MOESM2 [file 9487710]

## Phase 1

## Phase 2

### Procedure

-Cross-sectional survey

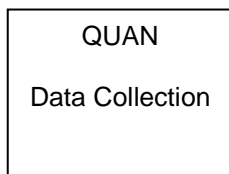

### Product

-Numeric data

### Procedure

-Focus group discussions or individual interviews

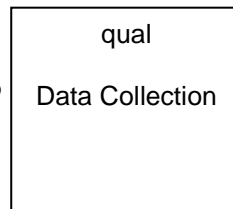

### Product

-Text data

-SPSS software

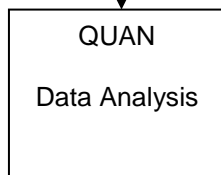

-Descriptive and analytic statistics  
-Regression

-Content analyses

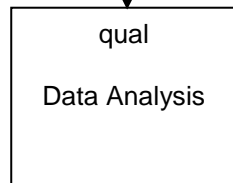

-Theme

### Procedure

-Interpretation and explanation of quantitative and qualitative results  
- Literature review  
- Expert panel & nominal group technique

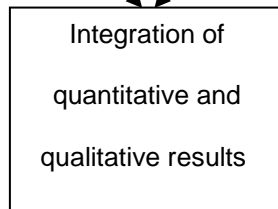

### Product

-Discussion  
- Offering health promotion strategies  
-Implications  
-Future research
